# Supplementary material for: Development of Effective PEDV Vaccine Candidates Based on Viral Culture and Protease Activity
Source: MDPI journal article supplement (doi:10.3390/vaccines11050923), 2023-04-30
Supplement: s1 [file s1]

## Supplementary Materials

(A) ORF 1a

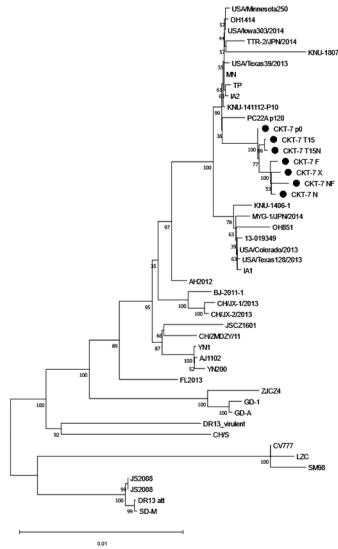

(B) ORF 1b

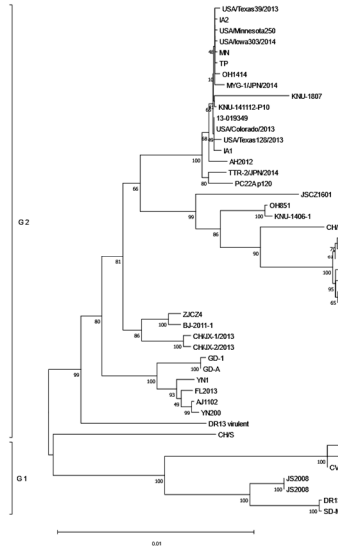

(C) Spike

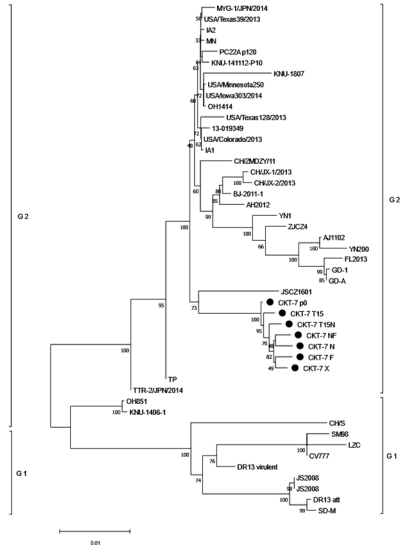

(D) ORF 3

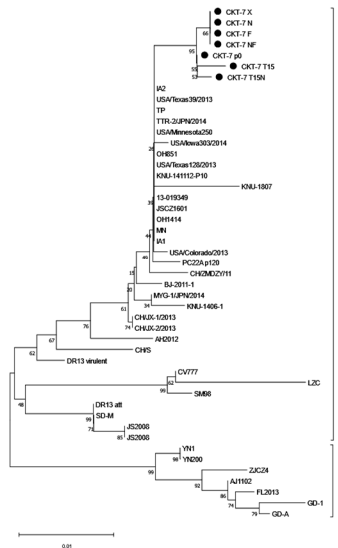

(E) Envelope

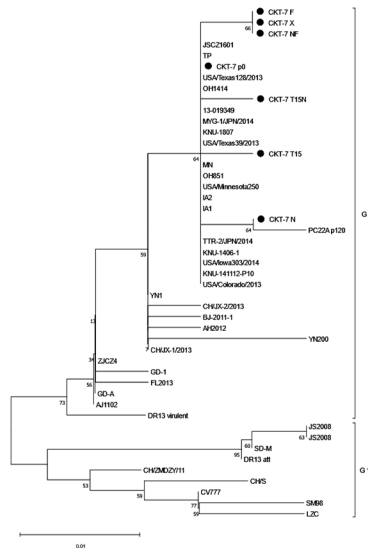

(F) Membrane

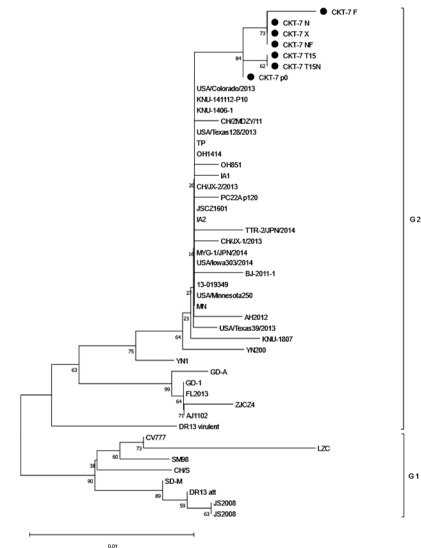

Phylogenetic tree of the Cxorf11 gene region. The tree shows relationships between various sequences, with bootstrap values indicated at the nodes. A scale bar of 0.04 is provided at the bottom left. A bracket on the right side groups several sequences together, labeled 'G1'.

Legend:

- Cxorf11 T15
- Cxorf11 X
- Cxorf11 NF
- Cxorf11 N
- Cxorf11 F
- Cxorf11 T15N
- Cxorf11 p6

Sequences and Bootstrap Values:

- JA1
- NI1
- TP
- USA/Texas/29/2013
- JA2
- GD-A
- USA/Israel/12/2013
- KNU3.141112.F10
- PC204-120
- USA/Columbia/2013
- USA/Mexico/250
- KNU3.1887
- CH1414
- MYG-1/UPN/2014
- 13-01909
- CH161
- 61 KNU3.1406-1
- TIR-2/UPN/2014
- 61 USA/New/20/2014
- BA-2011-1
- AV012
- NI1
- YIN20
- CH12/MZ/111
- JSC29801
- CH16A-1/2013
- 100 CH16A-3/2013
- DR13 isolate
- GD-A
- A1102
- FL2613
- GD-1
- ZC24
- SM6
- 100 CVT7
- L2C
- CH15
- DR13.at
- SD-M
- 12 ZC2000
- 12 ZC2000

Scale bar: 0.04

Group G1: CH16A-1/2013, CH16A-3/2013, CH15, DR13.at, SD-M, ZC2000, ZC2000

**Figure S1.** Analysis of phylogenetic relationship based on the nucleotide sequence of the ORF1a, ORF1b, spike (S), ORF3, envelope (E), membrane (M), and N genes. Phylogenetic tree of (A) the ORF1a gene; (B) the ORF1b gene; (C) the S gene; (D) the ORF3 gene; (E) the E gene; (F) the M gene; (G) the N gene. The trees were determined using the neighbor-joining method of MEGA X software. The bootstrap analysis was generated using 1000 replicates.

**Table S1.** Analysis of genomic alteration depend on strains

| Gene     | Nucleotide | Amino-acid position | PEDV strains |         |         |         |         |         |         |
|----------|------------|---------------------|--------------|---------|---------|---------|---------|---------|---------|
|          |            |                     | Parental     | T15     | T15N    | N       | NF      | F       | X       |
| ORF 1a/b | 4-6        | 2                   | GCT (A)      | GCT (A) | GCT (A) | GCT (A) | --- (-) | GCT (A) | GCT (A) |
|          | 7-9        | 3                   | AGC (S)      | AGC (S) | AGC (S) | AGC (S) | --- (-) | AGC (S) | AGC (S) |
|          | 10-12      | 4                   | AAC (N)      | AAC (N) | AAC (N) | AAC (N) | --- (-) | AAC (N) | AAC (N) |
|          | 13-15      | 5                   | CAT (H)      | CAT (H) | CAT (H) | CAT (H) | --- (-) | CAT (H) | CAT (H) |
|          | 16-18      | 6                   | GTT (V)      | GTT (V) | GTT (V) | GTT (V) | TTA (L) | GTT (V) | GTT (V) |
|          | 19-21      | 7                   | ACA (T)      | ACA (T) | ACA (T) | ACA (T) | CAT (H) | ACA (T) | ACA (T) |
|          | 23         | 8                   | TTG (L)      | TTG (L) | TTG (L) | TTG (L) | TGG (W) | TTG (L) | TTG (L) |
|          | 25-26      | 9                   | GCT (A)      | GCT (A) | GCT (A) | GCT (A) | CTT (L) | GCT (A) | GCT (A) |
|          | 31-33      | 11                  | GCC (A)      | GCC (A) | GCC (A) | GCC (A) | AAA (K) | GCC (A) | GCC (A) |
|          | 34-36      | 12                  | AAT (N)      | AAT (N) | AAT (N) | AAT (N) | CGA (R) | AAT (N) | AAT (N) |
|          | 37-39      | 13                  | GAT (D)      | GAT (D) | GAT (D) | GAT (D) | CCG (P) | GAT (D) | GAT (D) |
|          | 40         | 14                  | GCA (A)      | GCA (A) | GCA (A) | GCA (A) | TCA (S) | GCA (A) | GCA (A) |
|          | 43         | 15                  | GAA (E)      | GAA (E) | GAA (E) | GAA (E) | CAA (Q) | GAA (E) | GAA (E) |
|          | 518        | 173                 | ACA (T)      | ACA (T) | ACA (T) | ACA (T) | ACA (T) | ATA (I) | ATA (I) |
|          | 536        | 179                 | ACT (T)      | ATT (I) | ACT (T) |
|          | 833        | 278                 | TGC (C)      | TGC (C) | TGC (C) | TTC (F) | TTC (F) | TGC (C) | TTC (F) |
|          | 1601       | 534                 | CGC (R)      | CGC (R) | CTC (L) | CGC (R) | CGC (R) | CGC (R) | CGC (R) |
|          | 2254       | 752                 | GTT (V)      | GTT (V) | TTT (F) | GTT (V) | GTT (V) | GTT (V) | GTT (V) |
|          | 2815       | 939                 | AAG (K)      | AAG (K) | AAG (K) | AAG (K) | GAG (E) | AAG (K) | AAG (K) |
|          | 2858       | 953                 | GTT (V)      | GTT (V) | GTT (V) | GCT (A) | GTT (V) | GTT (V) | GTT (V) |
|          | 2941       | 981                 | CCC (P)      | TCC (S) |
|          | 3329       | 1110                | GCA (A)      | GCA (A) | GCA (A) | GCA (A) | GCA (A) | GCA (A) | GTA (V) |
|          | 4106       | 1369                | GGT (G)      | GGT (G) | GGT (G) | GAT (D) | GAT (D) | GAT (D) | GAT (D) |
|          | 4156       | 1386                | GAG (E)      | GAG (E) | GAG (E) | GAG (E) | GAG (E) | CAG (Q) | GAG (E) |
|          | 4369-4371  | 1457                | TTT (F)      | TTT (F) | TTT (F) | --- (-) | TTT (F) | TTT (F) | TTT (F) |
|          | 4592       | 1531                | ACT (T)      | AAT (N) | AAT (N) | ACT (T) | ACT (T) | ACT (T) | ACT (T) |
|          | 4691       | 1564                | TCT (S)      | TCT (S) | TCT (S) | TTT (F) | TTT (F) | TTT (F) | TTT (F) |



[illegible]

|              |           |      |         |         |         |         |         |         |         |
|--------------|-----------|------|---------|---------|---------|---------|---------|---------|---------|
|              | 3667      | 1223 | ATT (I) | ATT (I) | GTT (V) |
|              | 3679      | 1227 | GTG (V) | GTG (V) | GTG (V) | TTG (L) | GTG (V) | GTG (V) | GTG (V) |
|              | 3683      | 1228 | GTC (V) | GCC (A) | GTC (V) |
|              | 3757      | 1253 | GAT (D) | TAT (Y) | GAT (D) |
|              | 3818      | 1273 | AAT (N) | AAT (N) | ACT (T) |
|              | 4061      | 1354 | TGT (C) | TTT (F) | TGT (C) |
|              | 4070      | 1357 | TGC (C) | TTC (F) | TGC (C) |
|              | 4139-4140 | 1380 | TTT (F) | TGA (*) |
|              | 4141-4143 | 1381 | GAA (E) | --- (-) | --- (-) | --- (-) | --- (-) | --- (-) | --- (-) |
|              | 4144-4146 | 1382 | AAG (K) | --- (-) | --- (-) | --- (-) | --- (-) | --- (-) | --- (-) |
|              | 4147-4149 | 1383 | GTC (V) | --- (-) | --- (-) | --- (-) | --- (-) | --- (-) | --- (-) |
|              | 4150-4152 | 1384 | CAC (H) | --- (-) | --- (-) | --- (-) | --- (-) | --- (-) | --- (-) |
|              | 4153-4155 | 1385 | GTG (V) | --- (-) | --- (-) | --- (-) | --- (-) | --- (-) | --- (-) |
|              | 4156-4158 | 1386 | CAG (Q) | --- (-) | --- (-) | --- (-) | --- (-) | --- (-) | --- (-) |
|              | 4159-4161 | 1387 | TGA (*) | --- (-) | --- (-) | --- (-) | --- (-) | --- (-) | --- (-) |
| ORF3         | 506       | 169  | TTG (L) | TCG (S) | TTG (L) |
|              | 571       | 191  | GAT (D) | GAT (D) | GAT (D) | TAT (Y) | TAT (Y) | TAT (Y) | TAT (Y) |
|              | 602       | 201  | CAT (H) | CGT (R) | CAT (H) |
|              | 607       | 203  | ATT (I) | ATT (I) | GTT (V) | ATT (I) | ATT (I) | ATT (I) | ATT (I) |
| Envelope     | 119       | 40   | ACT (T) | ACT (T) | ATT (I) | ACT (T) | ACT (T) | ACT (T) | ACT (T) |
|              | 168       | 56   | TTG (L) | TTG (L) | TTG (L) | TTG (L) | TTC (F) | TTC (F) | TTC (F) |
|              | 191       | 64   | ATG (M) | ACG (T) | ATG (M) |
|              | 209       | 70   | CCT (P) | CCT (P) | CCT (P) | CTT (L) | CCT (P) | CCT (P) | CCT (P) |
| Membrane     | 70        | 24   | ATC (I) | ATC (I) | ATC (I) | TTC (F) | TTC (F) | TTC (F) | TTC (F) |
|              | 352       | 118  | GCG (A) | TCG (S) | TCG (S) | GCG (A) | GCG (A) | GCG (A) | GCG (A) |
|              | 656       | 219  | AGT (S) | AAT (N) | AGT (S) |
| Nucleocapsid | 497       | 166  | AGA (R) | AGA (R) | AGA (R) | ATA (I) | AGA (R) | AGA (R) | AGA (R) |
|              | 551       | 184  | CGT (R) | CGT (R) | CGT (R) | CCT (P) | CTT (L) | CGT (R) | CGT (R) |
|              | 1130      | 377  | GGG (G) | GGG (G) | GGG (G) | GAG (E) | GGG (G) | GGG (G) | GGG (G) |
|              | 1139      | 380  | AAA (K) | ATA (I) | AAA (K) |
